# Supplementary material
Source: MDPI journal article supplement (https://www.mdpi.com/2073-4441/15/2/260)
Supplement: s1 [file s1]

---

*Type of the Paper (Article, Review, Communication, etc.)*

# Energy utilization assessment of municipal sewage sludge based on SWOT-FAHP analysis

Lu Xiang, He Li \*, Yizhuo Wang, Linyan Qu, Dandan Xiao

School of Civil Engineering, Southeast University, Nanjing 211189, China

\* Correspondence: ericlihe@seu.edu.cn

**This Supplementary Material included**

**2 Pages**

**1 Table**

---

Table.S1 The situation of sewage treatment plants

| Sample number | Moisture content /% | High heating value<br>Q <sub>gr,d</sub> , kJ/kg | Industrial analysis/% |       |       |      | Elemental analysis/% |       |       |       |      |
|---------------|---------------------|-------------------------------------------------|-----------------------|-------|-------|------|----------------------|-------|-------|-------|------|
|               |                     |                                                 | M                     | A     | V     | FC   | C                    | H     | O     | N     | S    |
| A1            | 76.6                | 12794                                           | 1.50                  | 33.81 | 58.07 | 8.12 | 46.50                | 9.49  | 35.40 | 7.46  | 0.37 |
| A2            | 81.7                | 5328                                            | 2.66                  | 61.95 | 29.38 | 8.67 | 36.08                | 9.63  | 37.23 | 11.84 | 0.77 |
| A3            | 74.7                | 7743                                            | 2.37                  | 51.42 | 42.00 | 6.59 | 40.98                | 8.52  | 37.48 | 9.91  | 0.54 |
| A4            | 83.1                | 12020                                           | 2.92                  | 36.77 | 55.73 | 7.50 | 45.60                | 10.16 | 34.11 | 7.94  | 0.44 |
| A5            | 71                  | 12260                                           | 1.37                  | 35.89 | 55.76 | 8.34 | 47.89                | 8.23  | 35.16 | 7.57  | 0.37 |
| A6            | 64.5                | 7416                                            | 2.49                  | 49.53 | 42.56 | 7.91 | 37.71                | 9.65  | 40.15 | 9.48  | 0.50 |
| A7            | 76.5                | 7661                                            | 2.63                  | 49.11 | 42.06 | 8.83 | 35.41                | 10.50 | 41.15 | 9.76  | 0.58 |
| A8            | 37.9                | 5852                                            | 2.26                  | 60.16 | 33.35 | 6.49 | 40.23                | 8.44  | 33.91 | 13.35 | 0.58 |
| B1            | 68.8                | 8011                                            | 3.06                  | 49.52 | 41.78 | 8.71 | 39.46                | 10.38 | 36.55 | 9.99  | 0.52 |
| B2            | 69                  | 8372                                            | 1.79                  | 45.72 | 45.72 | 8.56 | 40.33                | 9.62  | 39.41 | 8.63  | 0.47 |
| B3            | 73.7                | 14800                                           | 2.47                  | 24.71 | 67.16 | 8.13 | 43.35                | 10.22 | 38.31 | 6.91  | 0.37 |
| B4            | 72.7                | 7155                                            | 2.72                  | 57.67 | 36.29 | 6.04 | 36.83                | 11.57 | 35.89 | 11.23 | 0.66 |
| B5            | 82.6                | 9281                                            | 2.78                  | 47.93 | 43.92 | 8.15 | 45.08                | 9.59  | 32.64 | 9.49  | 0.57 |
| B6            | 53.9                | 7718                                            | 2.76                  | 56.37 | 36.90 | 6.73 | 47.74                | 8.88  | 25.53 | 13.60 | 0.57 |
| C1            | 37.5                | 10213                                           | 2.81                  | 44.04 | 46.90 | 9.06 | 42.10                | 10.05 | 34.60 | 10.42 | 0.55 |
| C2            | 67.1                | 11230                                           | 1.77                  | 41.13 | 50.89 | 7.99 | 45.70                | 10.74 | 33.11 | 8.78  | 0.41 |
| C3            | 61.2                | 9794                                            | 2.17                  | 47.02 | 44.77 | 8.21 | 43.74                | 9.42  | 33.76 | 10.61 | 0.50 |
| C4            | 72.1                | 10935                                           | 2.59                  | 41.37 | 49.77 | 8.86 | 41.50                | 10.44 | 37.26 | 8.45  | 0.48 |
| C5            | 60.8                | 14005                                           | 2.12                  | 27.89 | 62.61 | 9.50 | 49.68                | 8.21  | 30.78 | 9.86  | 0.63 |
| C6            | 72.3                | 15069                                           | 2.81                  | 24.39 | 66.44 | 9.17 | 44.18                | 10.52 | 33.40 | 9.98  | 0.98 |
